# Supplementary material for: Roseburia hominis Alleviates Neuroinflammation via Short‐Chain Fatty Acids through Histone Deacetylase Inhibition
Source: PubMed Central journal article supplement — Mol Nutr Food Res. 2022 Jul 21;66(18):2200164. doi: 10.1002/mnfr.202200164 (PMC9787297; doi:10.1002/mnfr.202200164), 2022-07-21
Supplement: MNFR-66-2200164-s001.pdf [file MNFR-66-2200164-s001.pdf]

## Supplementary Materials

**Table S1** Levels of cytokines and chemokines in ACC compared among SPF, GF-PBS and GF-*R.h* rats (Mean  $\pm$  SD) (pg/mL).

|               | SPF (n=6)          | GF-PBS (n=6)       | GF- <i>R.h</i> (n=6) | P value                       |
|---------------|--------------------|--------------------|----------------------|-------------------------------|
| IL-1 $\alpha$ | 15.24 $\pm$ 2.44   | 10.10 $\pm$ 0.74   | 7.189 $\pm$ 1.38     | <0.001*<br><0.001#<br>0.022\$ |
| IL-6          | 94.86 $\pm$ 13.73  | 69.16 $\pm$ 25.29  | 67.06 $\pm$ 32.31    | n.s.                          |
| IL-12         | 13.12 $\pm$ 2.52   | 12.05 $\pm$ 3.61   | 11.03 $\pm$ 3.40     | n.s.                          |
| TNF- $\alpha$ | 114.60 $\pm$ 11.01 | 111.80 $\pm$ 26.25 | 128.60 $\pm$ 24.12   | n.s.                          |
| IFN- $\gamma$ | 130.63 $\pm$ 24.89 | 148.79 $\pm$ 49.13 | 78.40 $\pm$ 32.05    | 0.012\$                       |
| MCP-1         | 60.64 $\pm$ 13.64  | 63.12 $\pm$ 10.38  | 45.01 $\pm$ 6.77     | 0.025\$                       |

One-way ANOVA. \*, SPF vs. GF-PBS; #, SPF vs. GF-*R.h*; \$, GF-PBS vs. GF-*R.h*.

**Table S2** Levels of cytokines and chemokines in hippocampus compared among SPF, GF-PBS and GF-*R.h* rats (Mean  $\pm$  SD) (pg/mL).

|               | SPF (n=6)          | GF-PBS (n=6)       | GF- <i>R.h</i> (n=6) | P value                      |
|---------------|--------------------|--------------------|----------------------|------------------------------|
| IL-1 $\alpha$ | 35.48 $\pm$ 15.81  | 56.72 $\pm$ 13.17  | 29.54 $\pm$ 15.09    | 0.016\$                      |
| IL-6          | 181.23 $\pm$ 58.70 | 286.28 $\pm$ 75.52 | 162.61 $\pm$ 56.59   | 0.036*<br>0.012\$            |
| IL-12         | 28.56 $\pm$ 8.41   | 42.33 $\pm$ 10.97  | 26.36 $\pm$ 8.90     | 0.027\$                      |
| TNF- $\alpha$ | 124.42 $\pm$ 19.24 | 179.80 $\pm$ 13.26 | 153.41 $\pm$ 10.90   | <0.001*<br>0.011#<br>0.020\$ |
| IFN- $\gamma$ | 255.80 $\pm$ 65.14 | 359.10 $\pm$ 64.39 | 224.60 $\pm$ 93.78   | 0.020\$                      |
| MCP-1         | 93.80 $\pm$ 23.27  | 124.10 $\pm$ 9.90  | 98.98 $\pm$ 9.23     | 0.011*<br>0.034\$            |

One-way ANOVA. \*, SPF vs. GF-PBS; #, SPF vs. GF-*R.h*; \$, GF-PBS vs. GF-*R.h*.

**Table S3** Serum concentration of SCFAs compared among SPF, GF-PBS and GF-*R.h* rats. (Mean  $\pm$  SD) ( $\mu\text{g/mL}$ ).

|             | SPF               | GF-PBS            | GF- <i>R.h</i>    | <i>P</i> value    |
|-------------|-------------------|-------------------|-------------------|-------------------|
| Acetate     | 19.09 $\pm$ 7.55  | 10.13 $\pm$ 0.86  | 9.47 $\pm$ 1.26   | 0.008*<br>0.005#  |
| Propionate  | 0.77 $\pm$ 0.46   | 0.18 $\pm$ 0.059  | 0.27 $\pm$ 0.059  | 0.004*<br>0.016#  |
| Buterate    | 0.70 $\pm$ 0.35   | 0.13 $\pm$ 0.017  | 0.17 $\pm$ 0.024  | <0.001*<br>0.001# |
| Isobutyrate | 0.20 $\pm$ 0.088  | 0.044 $\pm$ 0.016 | 0.070 $\pm$ 0.031 | <0.001*<br>0.003# |
| Valerate    | 0.073 $\pm$ 0.027 | 0.053 $\pm$ 0.015 | 0.070 $\pm$ 0.013 | n.s.              |
| Isovalerate | 0.055 $\pm$ 0.030 | 0.031 $\pm$ 0.007 | 0.042 $\pm$ 0.009 | n.s.              |

One-way ANOVA. \*, SPF vs. GF-PBS; #, SPF vs. GF-*R.h*; \$, GF-PBS vs. GF-*R.h*.

**Table S4** Levels of cytokines and chemokines in ACC compared among GF, GF-Pro and GF-But rats (Mean  $\pm$  SD) (pg/mL).

|               | GF (n=7)           | GF-Pro (n=7)       | GF-But (n=7)       | P value          |
|---------------|--------------------|--------------------|--------------------|------------------|
| IL-1 $\alpha$ | 9.80 $\pm$ 6.98    | 3.01 $\pm$ 3.31    | 5.02 $\pm$ 5.36    | n.s.             |
| IL-6          | 82.49 $\pm$ 44.61  | 32.34 $\pm$ 19.48  | 55.24 $\pm$ 42.98  | 0.045*           |
| IL-12         | 12.05 $\pm$ 4.17   | 7.78 $\pm$ 2.33    | 7.89 $\pm$ 2.90    | n.s.             |
| TNF- $\alpha$ | 116.80 $\pm$ 13.75 | 114.60 $\pm$ 6.078 | 114.30 $\pm$ 20.94 | n.s.             |
| IFN- $\gamma$ | 122.30 $\pm$ 62.72 | 62.67 $\pm$ 32.60  | 85.97 $\pm$ 22.45  | 0.044*           |
| MCP-1         | 56.05 $\pm$ 17.89  | 33.16 $\pm$ 7.33   | 37.87 $\pm$ 9.52   | 0.007*<br>0.034# |

One-way ANOVA. GF-Pro, GF-propionate; GF-But, GF-butyrate. \*, GF vs. GF-Pro; #, GF vs. GF-But; \$, GF-Pro vs. GF-But.

**Table S5** Levels of cytokines and chemokines in hippocampus compared among GF, GF-Pro and GF-But rats (Mean  $\pm$  SD) (pg/mL).

|               | GF (n=7)           | GF-Pro (n=6)       | GF-But (n=6)      | P value            |
|---------------|--------------------|--------------------|-------------------|--------------------|
| IL-1 $\alpha$ | 53.25 $\pm$ 18.59  | 4.24 $\pm$ 1.08    | 5.53 $\pm$ 3.64   | <0.001*<br><0.001# |
| IL-6          | 267.30 $\pm$ 63.26 | 41.85 $\pm$ 9.20   | 46.54 $\pm$ 22.83 | <0.001*<br><0.001# |
| IL-12         | 39.13 $\pm$ 8.47   | 11.35 $\pm$ 1.71   | 11.89 $\pm$ 3.52  | <0.001*<br><0.001# |
| TNF- $\alpha$ | 177.70 $\pm$ 32.33 | 128.90 $\pm$ 31.06 | 89.45 $\pm$ 13.22 | 0.014*<br><0.001#  |
| IFN- $\gamma$ | 359.10 $\pm$ 72.88 | 71.11 $\pm$ 13.80  | 85.88 $\pm$ 33.68 | <0.001*<br><0.001# |
| MCP-1         | 124.07 $\pm$ 33.07 | 49.15 $\pm$ 5.89   | 46.23 $\pm$ 8.97  | <0.001*<br><0.001# |

One-way ANOVA. GF-Pro, GF-propionate; GF-But, GF-butyrate. \*, GF vs. GF-Pro; #, GF vs. GF-But; \$, GF-Pro vs. GF-But.

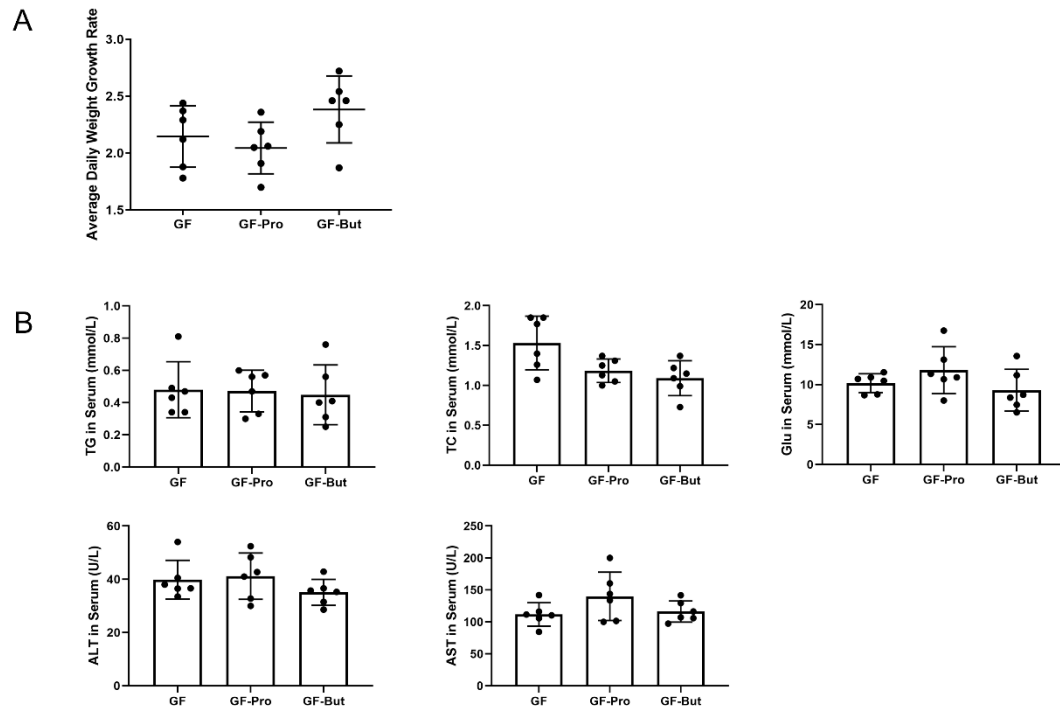

**Figure S1. Effects of propionate and butyrate on body weight and metabolic parameters.**

**A.** Average daily weight growth rate among GF, GF-Pro, and GF-But rats. **B.** Metabolic parameters (triglyceride, total cholesterol, glucose, alanine aminotransferase, and aspartate aminotransferase) in serum were determined using automatic biochemical analyzer (Mindray, Shenzhen, China) after 7 days gavage. Statistical analysis was performed by Kruskal-Wallis-test for non-parametric data with a Dunn's post-test. n=6. TG, triglyceride; TC, total cholesterol; Glu, glucose; ALT, alanine aminotransferase; AST, aspartate aminotransferase.
